# Supplementary material for: Enhanced efficiency of photocatalytically synthesised Co3+/Co2+-incorporated CeO2/SnO2 nanocomposite and supercapacitor studies
Source: Royal Society of Chemistry journal article supplement (doi:10.1039/d3ra07947c), 2024-01-01
Supplement: d3ra07947c1.pdf [file d3ra07947c1.pdf]

### 1 Synthesis of (Co<sup>3+</sup>/Co<sup>2+</sup>) incorporated CeO<sub>2</sub> composites

The Photo reactor, a quartz glass reactor, was used to disperse  $4.7786 \times 10^{-4}$  M of the *cis*-[Co(III)(Phen)<sub>2</sub>Cl<sub>2</sub>]Cl complex in 100 mL of plain water and distilled-H<sub>2</sub>O/Pr<sup>i</sup>OH (70/30% (v/v)) solvent medium separately. The ionic strength of the solution was maintained by adding 10 mL of sodium nitrate (1 M), 100 mg of CeO<sub>2</sub> catalyst, and magnetic stirring. The dispersion's wavelength was 254 nm when irradiated by a UV- lamp. The mixture was exposed to radiation for 20 minutes after being filtered and dried at room temperature. The samples obtained using plain water are referred and those using H<sub>2</sub>O/Pr<sup>i</sup>OH (70/30% (v/v)) are referred to as Table. 5.

### 2 Synthesis of (Co<sup>3+</sup>/Co<sup>2+</sup>) incorporated SnO<sub>2</sub> composites

The Photo reactor, a quartz glass reactor, was used to disperse  $4.7786 \times 10^{-4}$  M of the *cis*-[Co(III)(Phen)<sub>2</sub>Cl<sub>2</sub>]Cl complex in 100 mL of plain water and distilled-H<sub>2</sub>O/Pr<sup>i</sup>OH (70/30% (v/v)) solvent medium separately. The ionic strength of the solution was maintained by adding 10 mL of sodium nitrate (1 M), 100 mg of SnO<sub>2</sub> catalyst, and magnetic stirring. The dispersion's wavelength was 254 nm when irradiated by a UV- lamp. The mixture was exposed to radiation for 20 minutes after being filtered and dried at room temperature. The samples obtained using plain water and those using H<sub>2</sub>O/Pr<sup>i</sup>OH (70/30% (v/v)) are referred to as Table. 5.

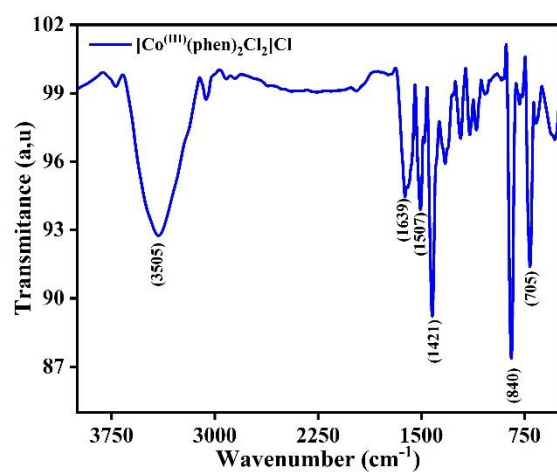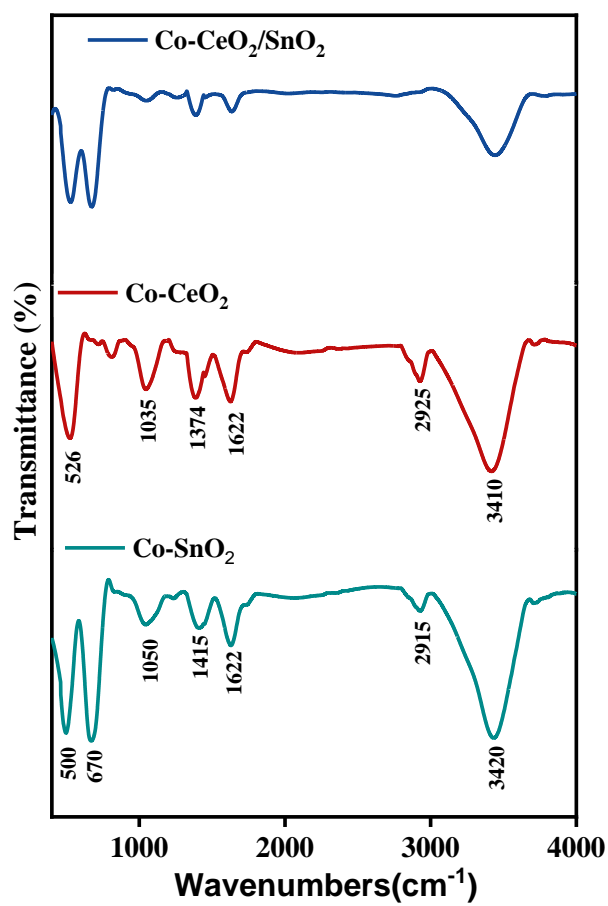

**S.1** IR – spectrum (a) Co-CeO<sub>2</sub>/SnO<sub>2</sub> nanocomposite, Co-CeO<sub>2</sub> and Co-SnO<sub>2</sub> nanospheres at room temperature and (b) *cis*-[Co(phen)<sub>2</sub>Cl<sub>2</sub>]Cl complex.

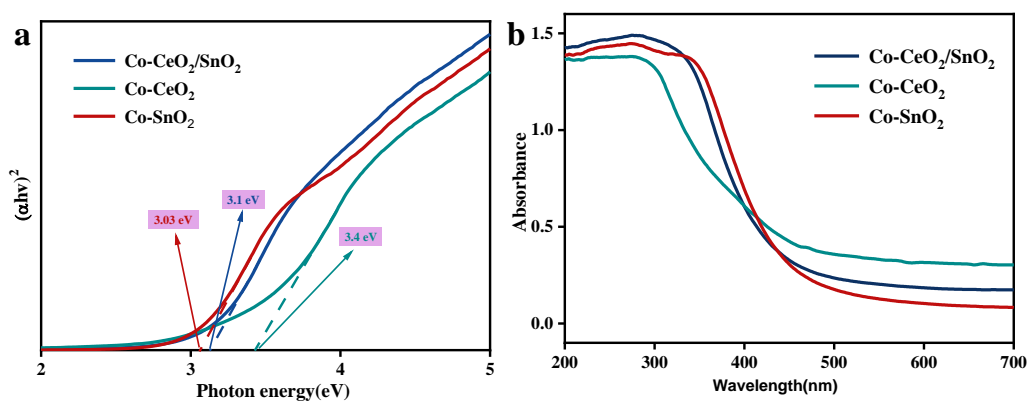

**S.2** UV-visible absorption spectra and tauc's plots ( $(\alpha h\nu)^2$  vs energy (eV)) of Co-CeO<sub>2</sub>/SnO<sub>2</sub> nanocomposite, Co-CeO<sub>2</sub> and Co-SnO<sub>2</sub> nanospheres at room temperature (Reflection standard: BaSO<sub>4</sub>).

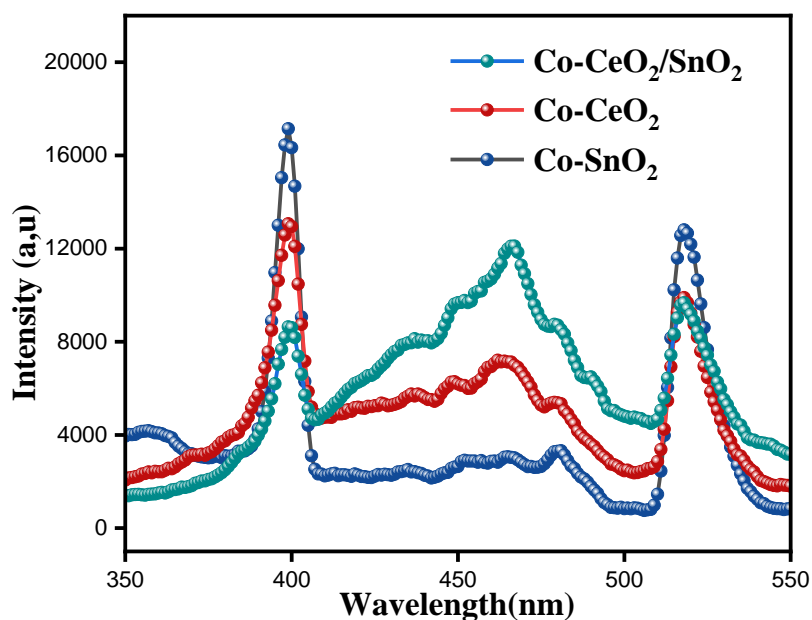

**S.3** Steady-state emission spectra of Co-CeO<sub>2</sub>/SnO<sub>2</sub> nanocomposite, Co-CeO<sub>2</sub> and Co-SnO<sub>2</sub> nanospheres at wavelength 295 nm at room temperature.

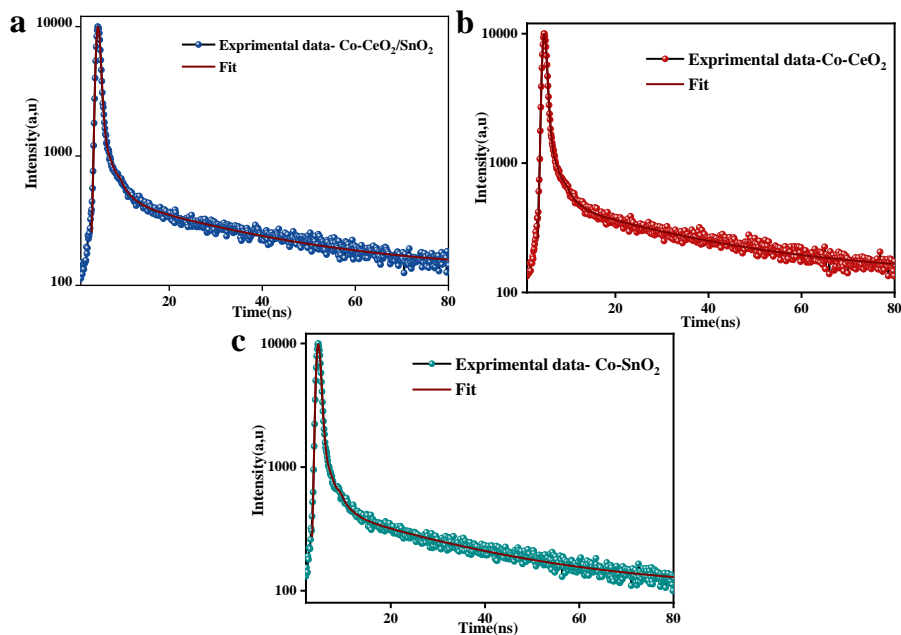

**S.4** Photoluminescence spectra(lifetime) of Co-CeO<sub>2</sub>/SnO<sub>2</sub> nanocomposite, Co-CeO<sub>2</sub> and Co-SnO<sub>2</sub> nanospheres at excitation wavelength 295 nm at room temperature. The discrete symbols are the experimental data and the continuous lines correspond to the tri-exponential fitted lines of the experimental data.

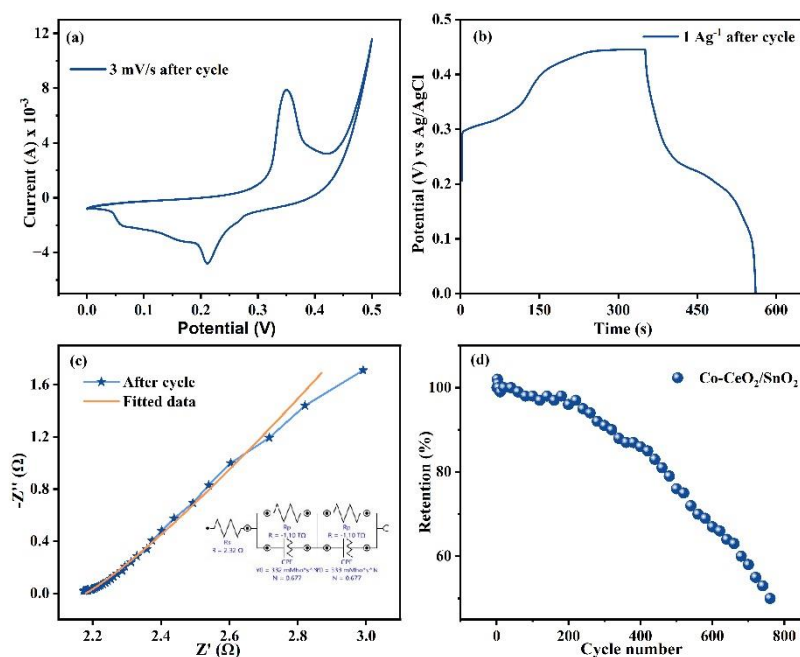

**S. 5** (a) After cycle CV curve of Co-CeO<sub>2</sub>/SnO<sub>2</sub> at scan rate: 3 mV/sec, (b) GCD contrast curve at the current density of 1 Ag<sup>-1</sup>, (c) ESI contrast curve of Co-CeO<sub>2</sub>/SnO<sub>2</sub>, (d) GCD contrast retention (%) at 3 Ag<sup>-1</sup>.
